# Supplementary material
Source: PubMed Central journal article supplement (PMC7980425)
Supplement: pnas.2019918118.sapp.pdf [file pnas.2019918118.sapp.pdf]

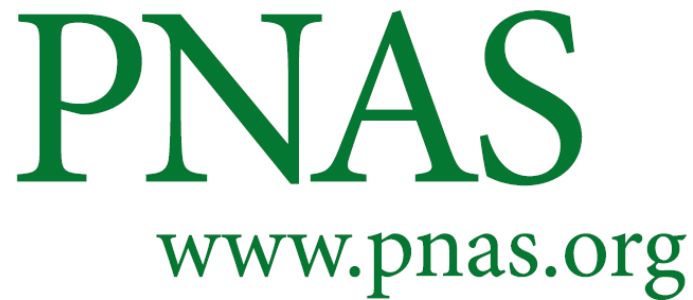

## Supplementary Information for

The intracellular environment affects protein-protein interactions

Shannon L. Speer<sup>a\*</sup>, Wenwen Zheng<sup>b,c\*</sup>, Xin Jiang<sup>b,c</sup>, I-Te Chu<sup>a</sup>, Alex J. Guseman<sup>a</sup>, Maili Liu<sup>b</sup>, Gary J. Pielak<sup>a,d,e,f,1</sup> and Conggang Li<sup>b,1</sup>

<sup>a</sup>Department of Chemistry, University of North Carolina, Chapel Hill, NC 27599, USA; <sup>b</sup>Key Laboratory of Magnetic Resonance in Biological Systems, State Key Laboratory of Magnetic Resonance and Atomic and Molecular Physics, National Center for Magnetic Resonance in Wuhan, Wuhan National Laboratory for Optoelectronics, Wuhan Institute of Physics and Mathematics, Innovation Academy for Precision Measurement Science and Technology, Chinese Academy of Sciences, Wuhan 430071, China; <sup>c</sup>Graduate University of Chinese Academy of Sciences, Beijing 100049, China. <sup>d</sup>Department of Biochemistry and Biophysics, University of North Carolina, Chapel Hill, North Carolina, Chapel Hill, NC 27599, USA; <sup>e</sup>Lineberger Comprehensive Cancer Center, University of North Carolina, Chapel Hill, NC 27599; <sup>f</sup>Integrative Program for Biological and Genome Sciences, University of North Carolina, Chapel Hill, NC 27599, USA

\*These authors contributed equally to this work.

<sup>1</sup>To whom correspondence should be addressed. Email: gary\_pielak@unc.edu; conggangli@wipm.ac.cn

This PDF file includes:  
Table S1  
Figures S1 to S12

**Table S1.** Equilibrium Dissociation Parameters at 298 K for 6-fluorotryptophan- and 288 K for 3-fluorotyrosine- labeled proteins.

| Condition                                                       | $K_{D \rightarrow M} (\mu M)$ | $\Delta G^{\circ'}_{D \rightarrow M}$<br>(kcal/mol) | $\Delta \Delta G^{\circ'}_{D \rightarrow M}$ <sup>a</sup><br>(kcal/mol) |
|-----------------------------------------------------------------|-------------------------------|-----------------------------------------------------|-------------------------------------------------------------------------|
| A34F; D40N <sup>-3,b</sup> , pH 7.6, 6-fluorotryptophan labeled |                               |                                                     |                                                                         |
| 20 mM NaP <sup>c</sup>                                          | $9 \pm 1^d$                   | $6.88 \pm 0.04$                                     | $0.84 \pm 0.07^d$                                                       |
| <i>E. coli</i>                                                  | only monomer                  | < 6                                                 | < 0.7 <sup>e</sup>                                                      |
| pH 7.4, 3-fluorotyrosine labeled                                |                               |                                                     |                                                                         |
| 20 mM NaP                                                       | $22 \pm 1$                    | $6.14 \pm 0.03$                                     | $0.34 \pm 0.04$                                                         |
| Oocytes                                                         | only dimer                    | > 7 <sup>f</sup>                                    | > 2 <sup>f</sup>                                                        |
| A34F <sup>-4</sup> , pH 7.6, 6-fluorotryptophan labeled         |                               |                                                     |                                                                         |
| 20 mM NaP                                                       | $37 \pm 4$                    | $6.04 \pm 0.06$                                     | 0                                                                       |
| <i>E. coli</i>                                                  | $11 \pm 4$                    | $6.8 \pm 0.2$                                       | $0.7 \pm 0.2$                                                           |
| pH 7.4, 3-fluorotyrosine labeled                                |                               |                                                     |                                                                         |
| 20 mM NaP                                                       | $40 \pm 2$                    | $5.80 \pm 0.03$                                     | 0                                                                       |
| Oocytes                                                         | $6.5 \pm 0.7$                 | $6.83 \pm 0.06$                                     | $1.03 \pm 0.07$                                                         |
| A34F; K10N <sup>-5</sup> , pH 7.6, 6-fluorotryptophan labeled   |                               |                                                     |                                                                         |
| 20 mM NaP                                                       | $58 \pm 3$                    | $5.78 \pm 0.06$                                     | $-0.26 \pm 0.08$                                                        |
| <i>E. coli</i>                                                  | only dimer                    | > 7 <sup>e</sup>                                    | > 0.7 <sup>e</sup>                                                      |
| pH 7.4, 3-fluorotyrosine labeled                                |                               |                                                     |                                                                         |
| 20 mM NaP                                                       | $132 \pm 6$                   | $5.11 \pm 0.03$                                     | $-0.69 \pm 0.04$                                                        |
| 100 g/L Lysate                                                  | $48 \pm 3$                    | $5.69 \pm 0.03$                                     | $-0.11 \pm 0.04$                                                        |
| Oocytes                                                         | $16 \pm 2$                    | $6.31 \pm 0.05$                                     | $0.51 \pm 0.06$                                                         |
| A34F; N37D <sup>-5</sup> , pH 7.6, 6-fluorotryptophan labeled   |                               |                                                     |                                                                         |
| 20 mM NaP                                                       | $16 \pm 1$                    | $6.54 \pm 0.06$                                     | $0.50 \pm 0.08$                                                         |
| <i>E. coli</i>                                                  | only dimer                    | > 7 <sup>e</sup>                                    | > 0.7 <sup>e</sup>                                                      |
| pH 7.4, 3-fluorotyrosine labeled                                |                               |                                                     |                                                                         |
| 20 mM NaP                                                       | $21.9 \pm 0.6$                | $6.14 \pm 0.02$                                     | $0.34 \pm 0.04$                                                         |
| Oocytes                                                         | $1.7 \pm 0.1$                 | $7.60 \pm 0.03$                                     | $1.80 \pm 0.04$                                                         |

Footnotes

<sup>a</sup> $\Delta \Delta G^{\circ'}_{D \rightarrow M} = \Delta G^{\circ'}_{D \rightarrow M, var} - \Delta G^{\circ'}_{D \rightarrow M, A34F, buffer}$

<sup>b</sup>Superscripts denote net charge at neutral pH

<sup>c</sup>NaP, sodium phosphate buffer

<sup>d</sup>Uncertainties are the standard deviation of the mean from triplicate measurements

<sup>e</sup>Stabilities greater than or less than the detection limit

<sup>f</sup>Not determined because monomer and dimer have similar shifts in oocytes, but lysate data suggest the dimer is more stable in oocytes.

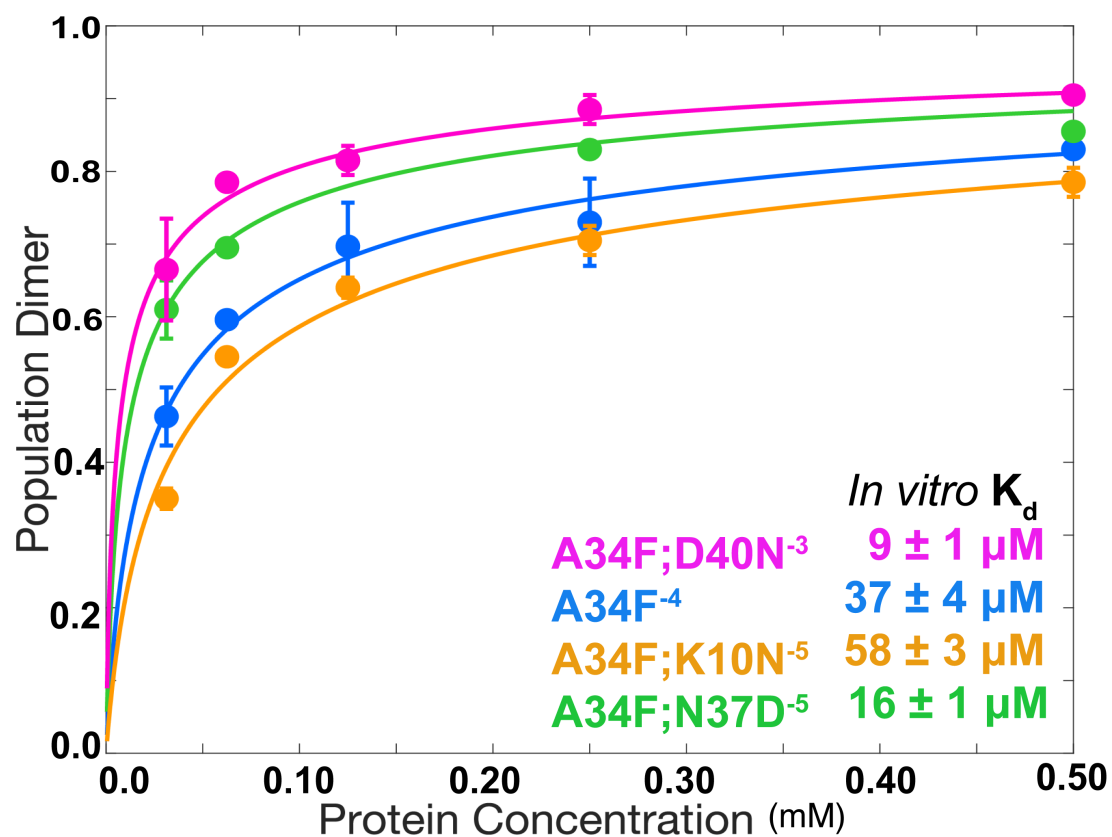

**Fig. S1:** Quantifying dissociation of 3-fluorotryptophan labeled A34F<sup>-4</sup>, A34F;N37D<sup>-5</sup>, A34F;D40N<sup>-3</sup>, and A34F;K10N<sup>-5</sup> GB1 in buffer. Uncertainties are the standard deviation of the mean from triplicate experiments. Superscripts denote net charge at pH 7.5.

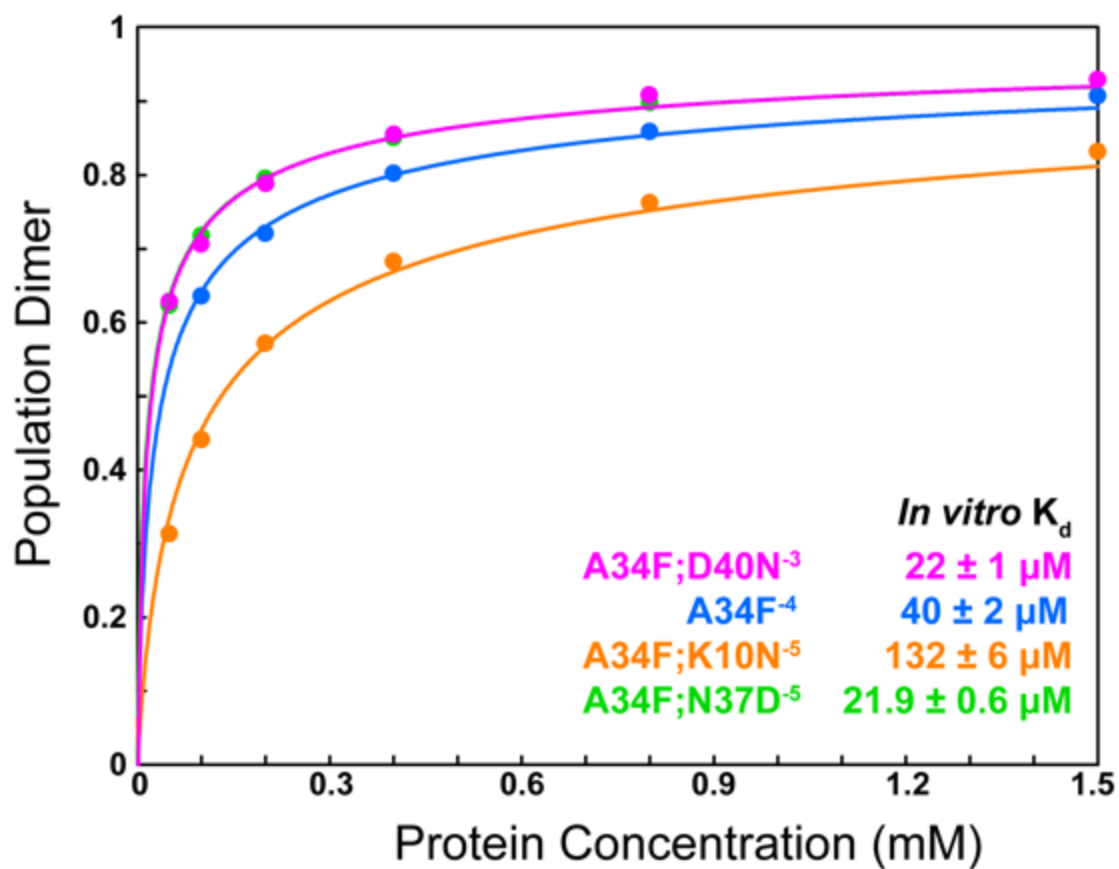

**Fig. S2:** Quantifying dissociation of 3-fluorotyrosine labeled A34F<sup>-4</sup>, A34F;N37D<sup>-5</sup>, A34F;D40N<sup>-3</sup>, and A34F;K10N<sup>-5</sup> GB1 in buffer. Superscripts denote net charge at pH 7.5. Uncertainties are derived from least squares fitting.

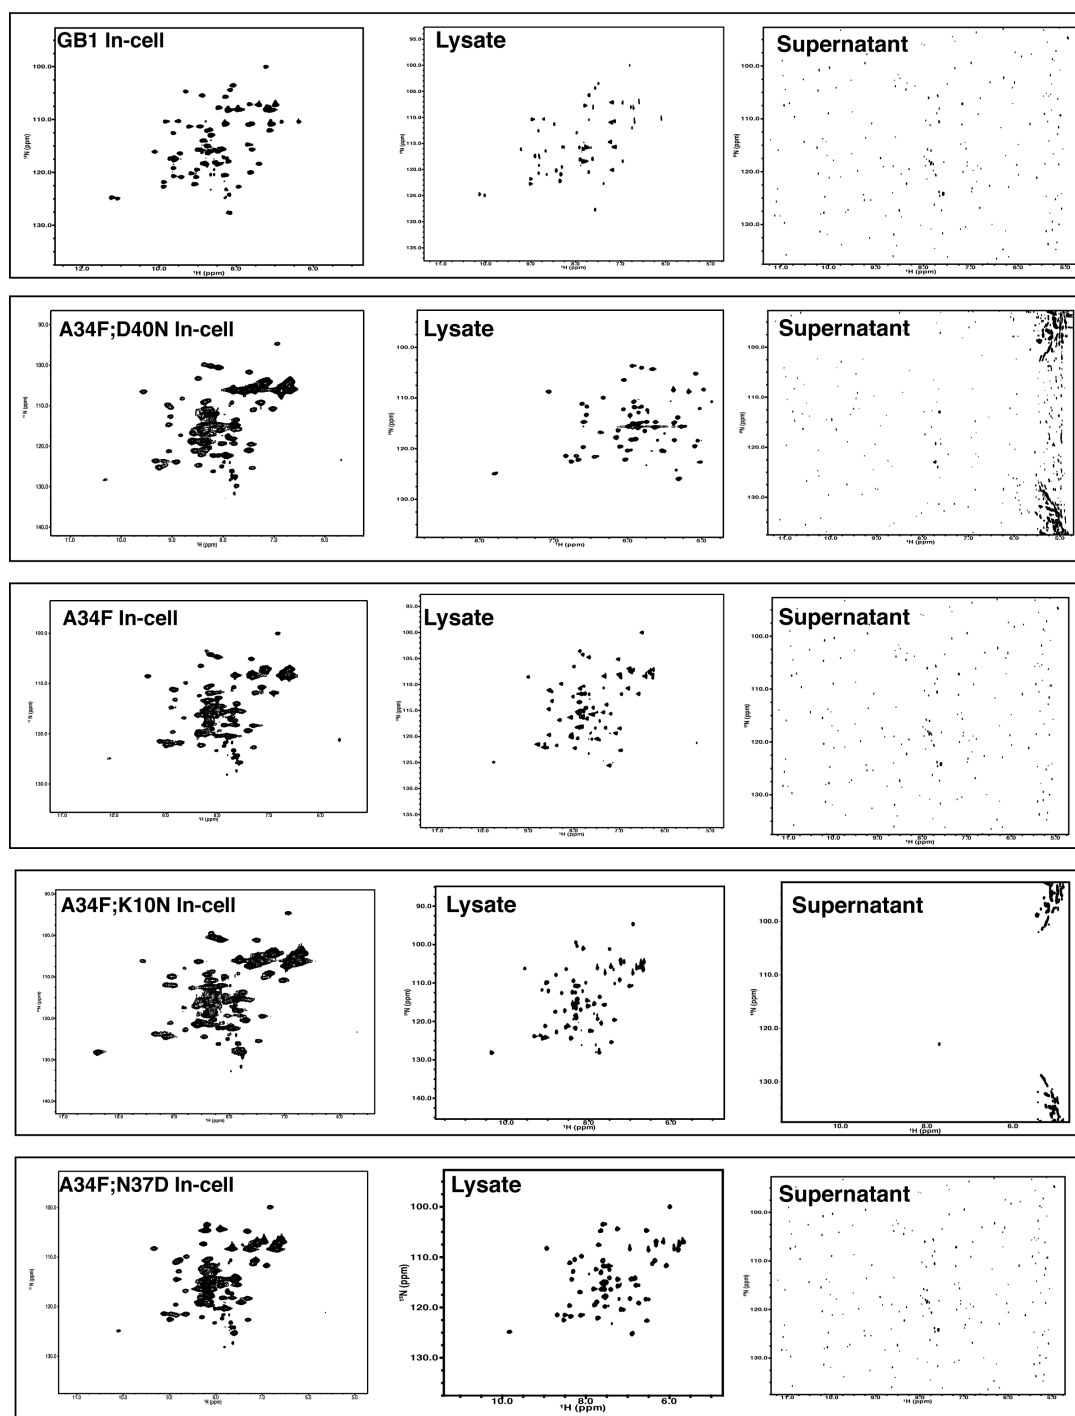

**Fig. S3:**  $^{15}\text{N}$ - $^1\text{H}$  HSQC spectra of  $^{19}\text{F}$ -Trp labeled GB1<sup>-4</sup>, A34F;D40N<sup>-3</sup> GB1, A34F<sup>-4</sup> GB1, A34F;K10N<sup>-5</sup> GB1, and A34F;N37D<sup>-5</sup> GB1 in *E. coli* at 298 K, pH 7.5. Lysate and supernatant controls verify that the protein of interest is inside cells. Supernatant spectra are zoomed-in to show there is no protein leakage.

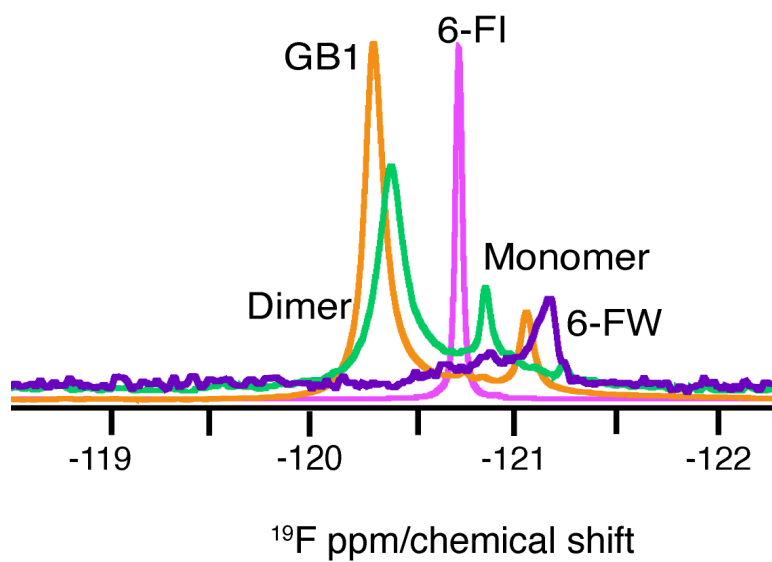

**Fig. S4:**  $^{19}\text{F}$  spectra of GB1 (orange) and A34F GB1 induced in *E. coli* (green) confirm that there is no overlap of monomer and 6-FW in cells. The spectrum of A34F GB1 without inducer confirms the second resonance in the GB1 spectrum is 6-FW (purple). Control spectrum of 6-FI in buffer (magenta) confirms there is no overlap with the monomer or dimer in cells.

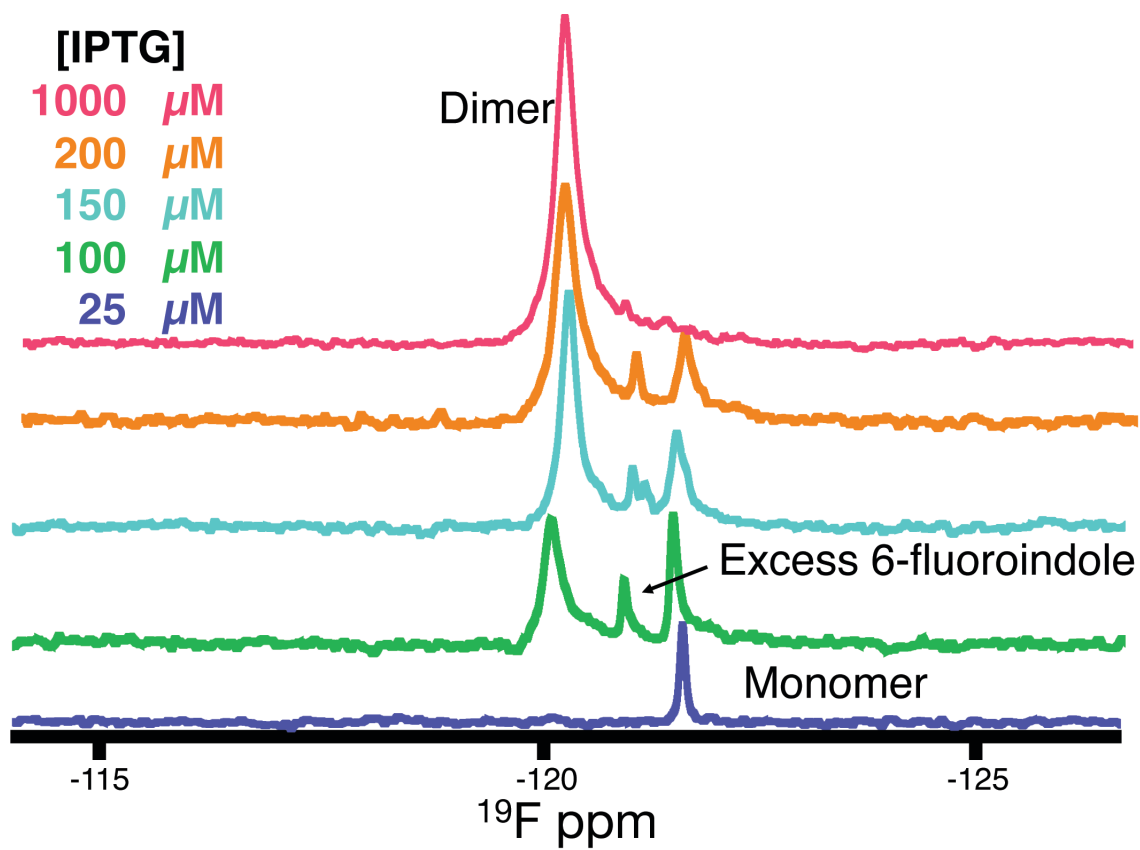

**Fig. S5:**  $^{19}\text{F}$  NMR Spectra of 6-fluoroindole-labeled A34F GB1 in *E. coli* Tuner cells as a function of inducer (IPTG) concentration.

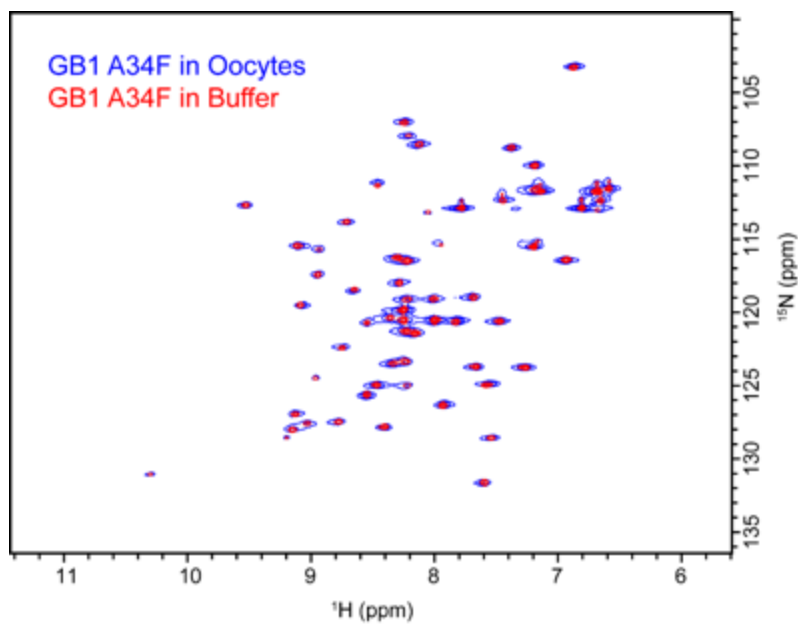

**Fig. S6:**  $^1\text{H}$ - $^{15}\text{N}$  HSQC spectra in oocytes (blue) and in buffer (red, 20 mM phosphate buffer, pH 7.4) of  $^{15}\text{N}$ -enriched, 3FY-labeled A34F GB1.



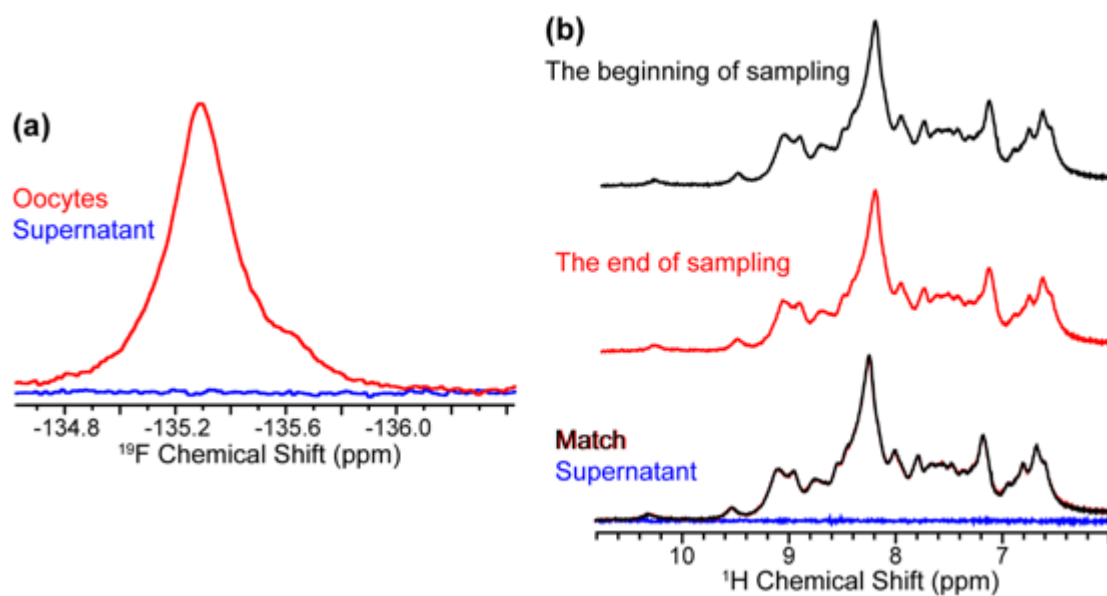

**Fig. S7:** A34F GB1 is stable in oocytes for the duration of the NMR experiment, and there is no leakage. (a)  $^{19}\text{F}$  NMR spectra of A34F GB1 in oocytes (red) and supernatant (blue). (b) 1D  $^1\text{H}$ - $^{15}\text{N}$  HSQC spectra of A34F GB1 in oocytes before (black) and after (red) acquisition of the  $^{19}\text{F}$  NMR spectrum.

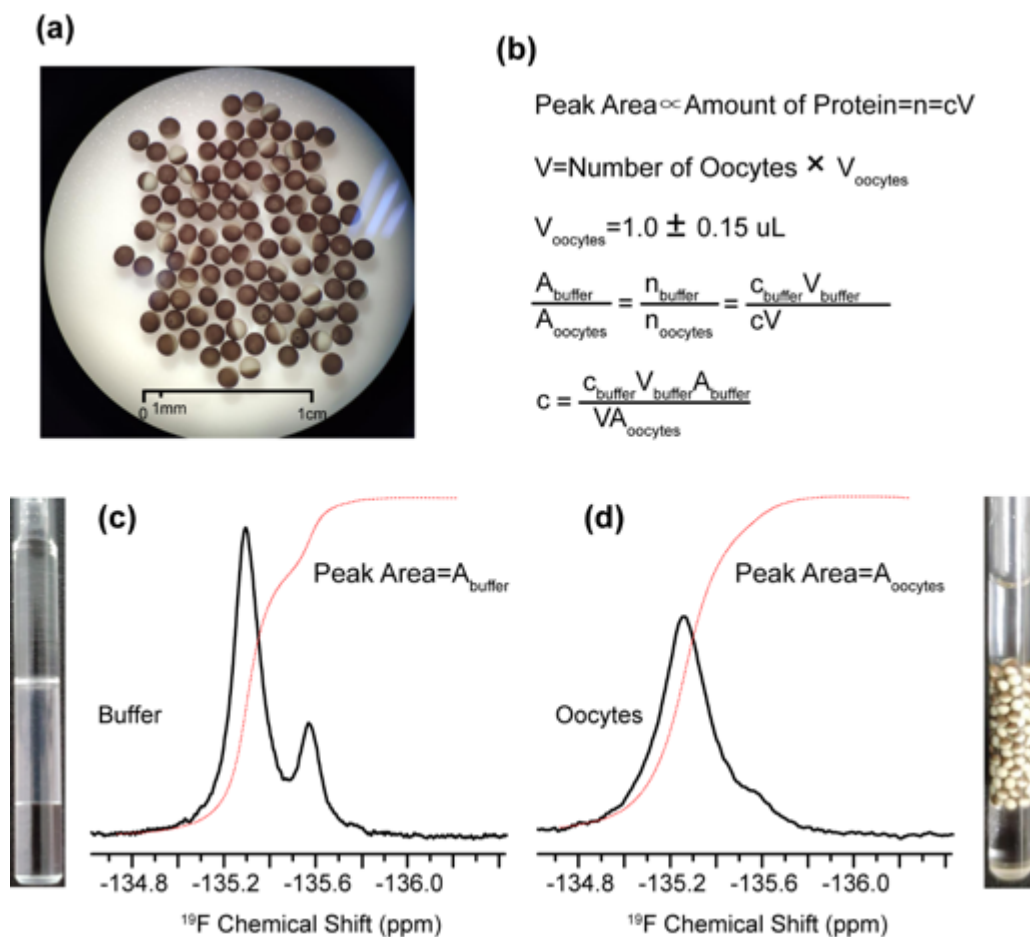

**Fig. S8:** Concentration of A34F GB1 in oocytes. (a) Oocytes for in-cell NMR experiments. (b) Equation to determine intraoocyte A34F concentration [ $A_{\text{buffer}}$ ,  $A_{\text{oocytes}}$ , areas of  $^{19}\text{F}$  NMR resonance in buffer;  $n_{\text{buffer}}$ ,  $n_{\text{oocytes}}$ , total moles of proteins;  $c_{\text{buffer}}$ ,  $c_{\text{oocytes}}$ , concentration of proteins in buffer, oocytes;  $V_{\text{buffer}}$ ,  $V_{\text{oocytes}}$ , volumes of buffer]. (c and d) Buffer and oocytes containing A34F GB1 in Shigemitsu micro-NMR tubes and their integrated  $^{19}\text{F}$  NMR spectra.

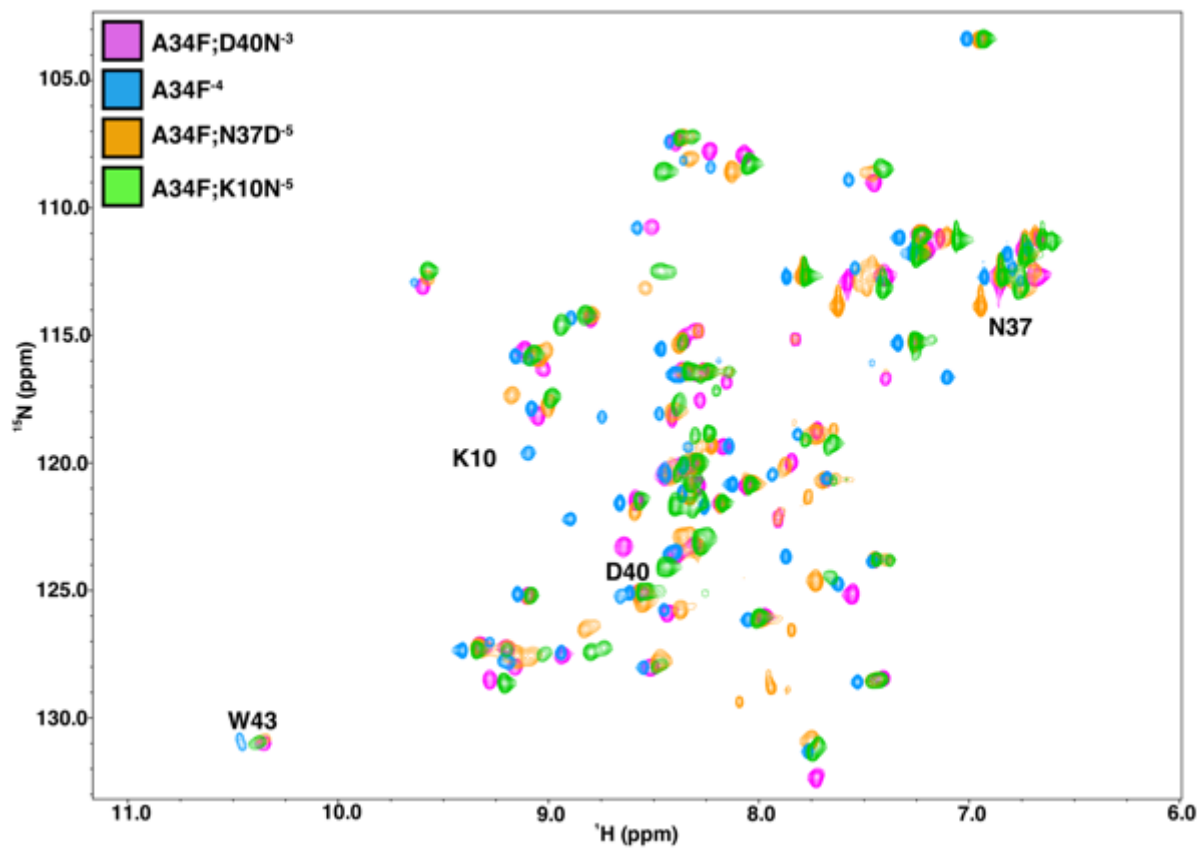

**Fig. S9:**  $^{15}\text{N}$ - $^1\text{H}$  HSQC spectra of 6FI-labeled proteins in buffer alone. Superscripts denote net charge at neutral pH.

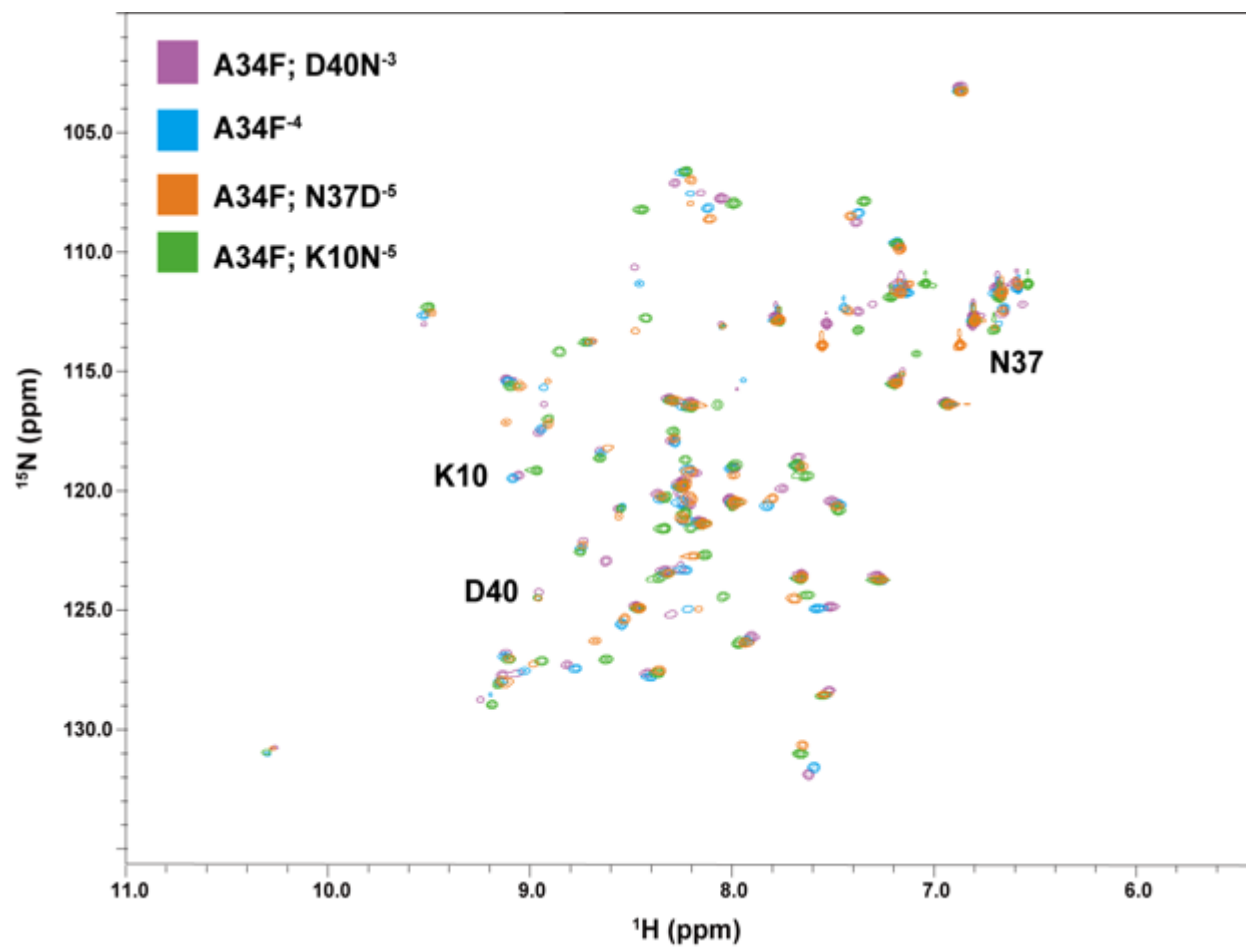

**Fig. S10:**  $^{15}\text{N}$ - $^1\text{H}$  HSQC spectra of 3FY-labeled proteins in buffer alone. Superscripts denote net charge at neutral pH.

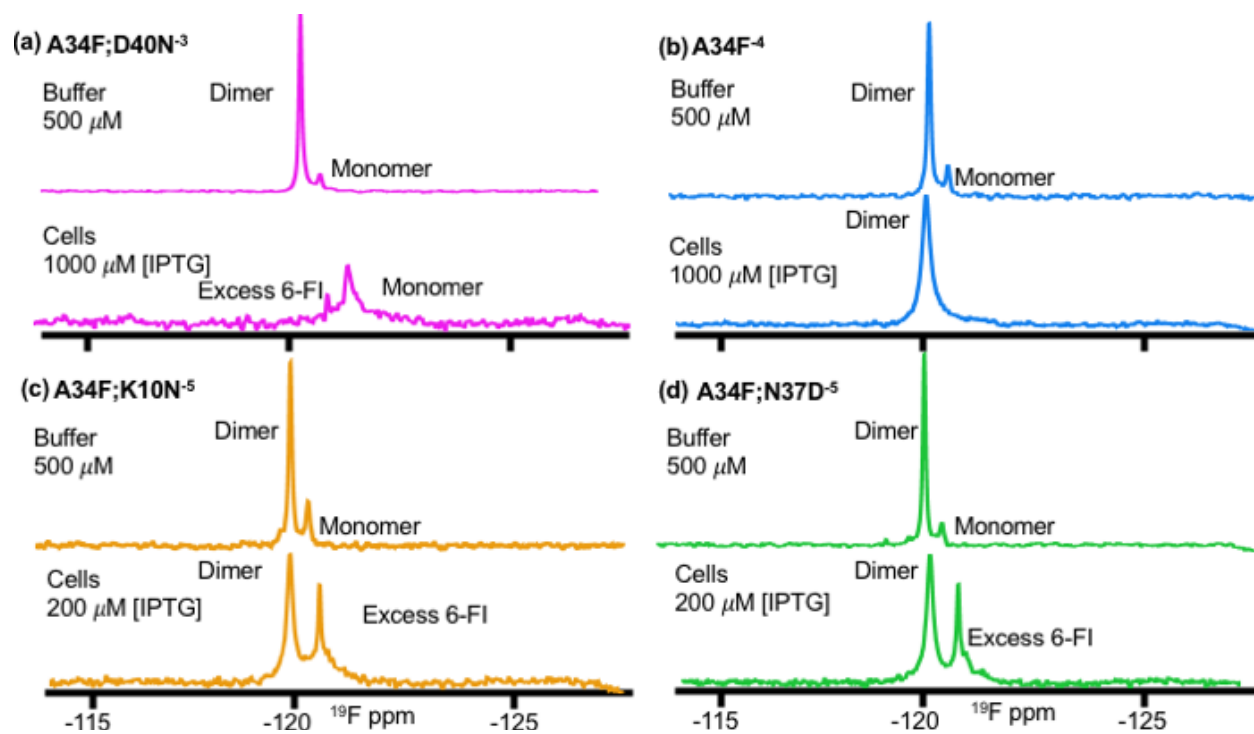

**Fig. S11:** <sup>19</sup>F NMR spectra in buffer and *E. coli* of 6-fluorotryptophan (6-FI)-labeled variants that show only monomer or dimer in cells: A34F; D40N<sup>-3</sup> (a), A34F<sup>-4</sup> (b), A34F; K10N<sup>-5</sup>, (c) A34F; N37D<sup>-5</sup>. Superscripts denote net charge at pH 7.5.

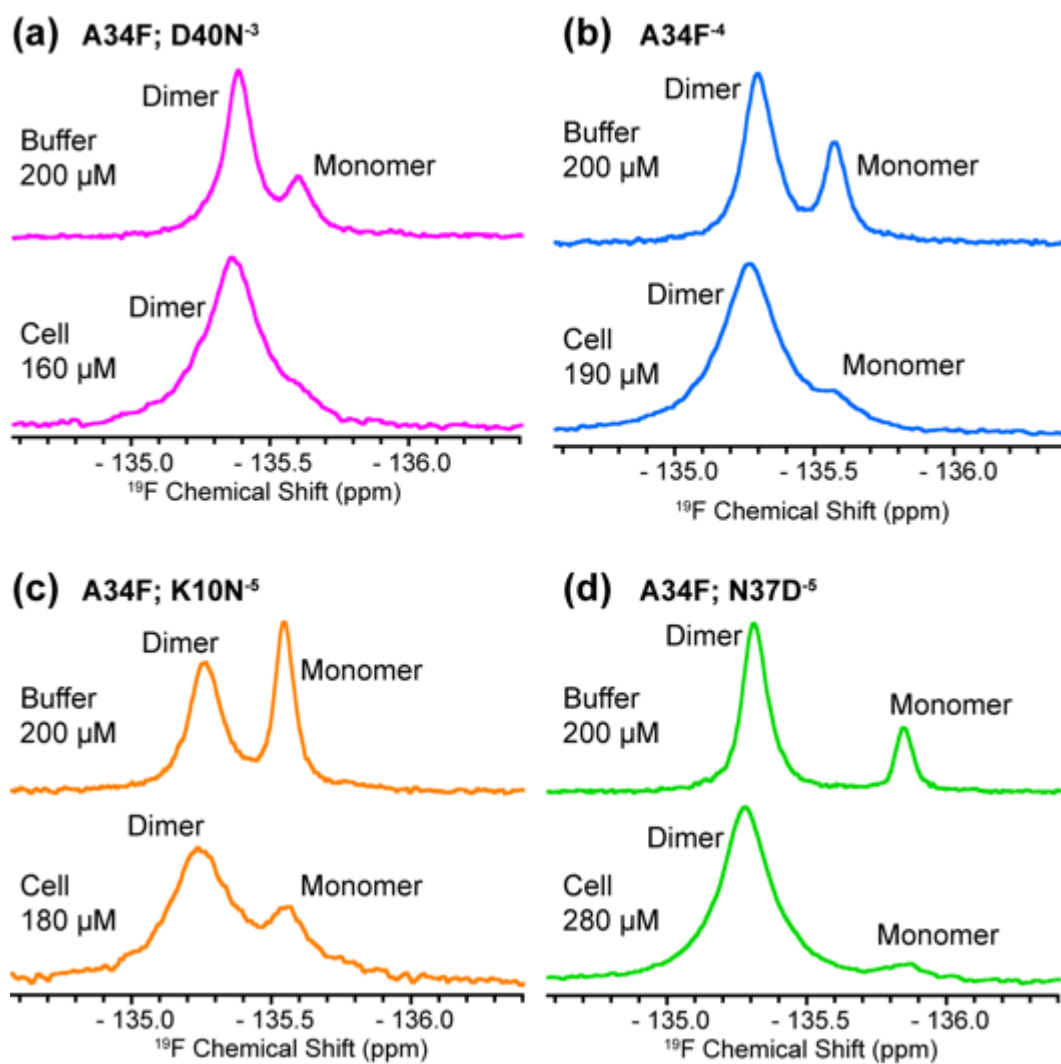

**Fig. S12:**  $^{19}\text{F}$  spectra of 3-fluorotyrosine labeled A34F;D40N<sup>-3</sup> GB1 (a), A34F<sup>-4</sup> GB1 (b), A34F;K10N<sup>-5</sup> GB1 (c) and A34F;N37D<sup>-5</sup> GB1 (d) in buffer (red) and oocytes (blue). Superscripts denote net charge at pH 7.5.
